# Supplementary material
Source: PubMed Central journal article supplement (PMC6248209)
Supplement: jamafacialplastsurg-20-460-s001.pdf [file jamafacialplastsurg-20-460-s001.pdf]

## Supplementary Online Content

Li K, Moubayed SP, Spataro E, Most SP. Risk factors for corrective septorhinoplasty associated with initial treatment of isolated nasal fracture. *JAMA Facial Plast Surg*. Published online June 14, 2018. doi:10.1001/jamafacial.2018.0336

### **eTable.** Billing Codes Used to Define Data Elements

This supplementary material has been provided by the authors to give readers additional information about their work.

**eTable. Billing Codes Used to Define Data Elements**

| <b>Data element</b>                        | <b>ICD-9 or CPT code</b>                                                                                               |
|--------------------------------------------|------------------------------------------------------------------------------------------------------------------------|
| <b>Included data</b>                       |                                                                                                                        |
| Nasal fracture                             | 802.0: Closed fracture of nasal bones                                                                                  |
|                                            | 802.1: Open fracture of nasal bones                                                                                    |
| <b>Excluded data</b>                       |                                                                                                                        |
| Other facial fracture                      | 802.2x: Closed fracture of mandible                                                                                    |
|                                            | 802.3x: Open fracture of mandible                                                                                      |
|                                            | 802.4: Closed fracture of malar and maxillary bones                                                                    |
|                                            | 802.5: Open fracture of malar and maxillary bones                                                                      |
|                                            | 802.6: Closed fracture of orbital floor (blow-out)                                                                     |
|                                            | 802.7: Open fracture of orbital floor (blow-out)                                                                       |
|                                            | 802.8: Closed fracture of other facial bones                                                                           |
| 802.9: Open fracture of other facial bones |                                                                                                                        |
| <b>Initial fracture treatment</b>          |                                                                                                                        |
| Closed treatment                           | 21310: Closed treatment of nasal bone fracture without manipulation                                                    |
|                                            | 21315: Closed treatment of nasal bone fracture without stabilization                                                   |
|                                            | 21320: Closed treatment of nasal bone fracture with stabilization                                                      |
|                                            | 21.71: Closed reduction of nasal fracture                                                                              |
| Open treatment                             | 21325: Open treatment of nasal bone fracture, uncomplicated                                                            |
|                                            | 21330: Open treatment of nasal bone fracture, with skeletal fixation                                                   |
|                                            | 21335: Open treatment of nasal bone fracture, with concomitant open treatment of fractured septum                      |
|                                            | 21.72: Open reduction of nasal fracture                                                                                |
|                                            | Any of the surgeries assessed as outcome measures (rhinoplasty, septoplasty); see below sub-section entitled "Outcome" |
| <b>Comorbidities</b>                       |                                                                                                                        |
| Tobacco use                                | 305.1, V15.82                                                                                                          |
| Autoimmune or immunodeficiency disorders   | Autoimmune disease: 446.4, 135, 710.0, G8859, G8860                                                                    |
|                                            | Immunodeficiency: 042, 279.x, 203.x, 204.x, 205.x, 206.x, 207.x, 288.x                                                 |
| Anxiety                                    | 300.00, 300.02, 300.09                                                                                                 |
| Deviated septum                            | 470                                                                                                                    |
| Turbinate hypertrophy                      | 478.0                                                                                                                  |
| Nasal obstruction                          | 478.19                                                                                                                 |
| Other nasal injury                         | Acquired deformity of the nose: 738.0                                                                                  |
|                                            | Congenital deformity of the nose: 748.1, 754.0                                                                         |
|                                            | Late effect of fracture of skull and face: 905.0                                                                       |
|                                            | Malunion of fracture: 733.81                                                                                           |

**eTable. Continued**

| Data element                                                       | ICD-9 or CPT code                                                                                               |
|--------------------------------------------------------------------|-----------------------------------------------------------------------------------------------------------------|
| <b>Outcome</b>                                                     |                                                                                                                 |
| Surgery later than six months following initial fracture treatment | 30400: Primary rhinoplasty, lateral and alar cartilages, and/or tip                                             |
|                                                                    | 30410: Primary rhinoplasty, bony pyramid, lateral and alar cartilage, and/or tip                                |
|                                                                    | 21.83: Total nasal reconstruction                                                                               |
|                                                                    | 21.86: Limited rhinoplasty                                                                                      |
|                                                                    | 30430: Secondary rhinoplasty, minor revision (nasal tip)                                                        |
|                                                                    | 30435: Secondary rhinoplasty, intermediate revision (bony work with osteotomies)                                |
|                                                                    | 30450: Secondary rhinoplasty, major revision (nasal tip and osteotomies)                                        |
|                                                                    | 30460: Cleft rhinoplasty, including columellar lengthening, tip only                                            |
|                                                                    | 30462: Cleft rhinoplasty, including columellar lengthening, tip, septum, and osteotomies                        |
|                                                                    | 30420: Primary rhinoplasty, bony pyramid, lateral and alar cartilages and/or tip, including major septal repair |
|                                                                    | 30465: Repair of vestibular stenosis (eg, spreader grafting, lateral nasal wall reconstruction)                 |
|                                                                    | 30520: Septoplasty or submucous resection with or without cartilage scoring, contouring, replacement with graft |
|                                                                    | 21.5: Submucous resection of nasal septum                                                                       |
|                                                                    | 21.88: Other septoplasty                                                                                        |

ICD-9 = International Classification of Disease, Ninth Revision, Clinical Modification; CPT = Current Procedural Terminology
